# Supplementary material for: Knowledge, attitudes, practices, and the effects of COVID-19 among the youth in Kenya
Source: Research Square preprint supplement (doi:10.21203/rs.3.rs-34861/v3), 2021-01-11
Supplement: Supplementary file 1 [file cd5e1d933e5b992e50af3f4b.docx]

# COVID-19 RELATED KNOWLEDGE, ATTITUDE AND PRACTICE AND THE EFFECTS OF COVID-19 AMONG THE YOUTH IN KENYA

Thank you for considering to participate in an online study that aims to assess how COVID-19 has affected our lives as young people in Kenya. Y-ACT, Youth in Action, a national youth-led advocacy initiative is working in partnership with different stakeholders on the response to Coronavirus. We would like to ask some general questions about the Corona virus, what you know about it and what your concerns might be. There are no right or wrong answers and the answers you provide will not lead to any direct benefits or penalties for your household. The answers that you give provide us a better understanding of what the youth know, and youth priorities to enable partners and stakeholders’ better respond. There are no risks or benefits to participating in this survey.

| **DEMOGRAPHICS** | | | | | | |
| --- | --- | --- | --- | --- | --- | --- |
| **NO.** | **QUESTIONS AND FILTERS** | | **CODING CATEGORIES** | | **SKIP patterns** | |
|  | Do you agree to participate? | | 1=yes | | **If No -Click refusal** | |
| 0=No | |
| **100** | County of residence | |  | |  | |
| **101** | How old are you? (enter in Years*)* | |  | |  | |
| **102** | Record gender of respondent | Male | 1 | |  | |
| Female | 2 | |  | |
| Intersex | 3 | |  | |
| Transgender | 4 | |  | |
| Gender non-conforming | 5 | |  | |
| **103** | What is your current marital status? | Married | 1 | |  | |
| Living together with partner but not married | 2 | |  | |
| Separated | 3 | |  | |
| Divorced | 4 | |  | |
| Widowed | 5 | |  | |
| Single | 6 | |  | |
| No response | 88 | |  | |
| **104** | What is the highest level of education you have completed? | No schooling | 0 | |  | |
| Incomplete primary school | 1 | |  | |
| Completed primary school | 2 | |  | |
| Incomplete secondary school | 3 | |  | |
| Completed secondary school | 4 | |  | |
| Incomplete higher education | 5 | |  | |
| Completed higher education (Tech, college, university) | 6 | |  | |
| Don't know, no response | 88 | |  | |
| **105** | What is your employment status? | No employment | 1 | |  | |
| Formal employment | 2 | |  | |
| Self-employed | 3 | |  | |
| No response | 88 | |  | |
| **Knowledge on COVID-19 Virus** | | | | | | |
|  |  | **Check boxes** | **NO** | | **YES** | |
| **106** | Who can become infected with Corona?    **Record all that you are aware of** | Pregnant women | 0 | | 1 | |
| Women | 0 | | 1 | |
| Men | 0 | | 1 | |
| Elderly | 0 | | 1 | |
| Children | 0 | | 1 | |
| Everybody | 0 | | 1 | |
| People who travelled | 0 | | 1 | |
| Mzungus | 0 | | 1 | |
| Chinese | 0 | | 1 | |
| Not Africans/Kenyans | 0 | | 1 | |
| People living in cold countries | 0 | | 1 | |
| No-one - it is a hoax | 0 | | 1 | |
| People who interact with animals | 0 | | 1 | |
| Don't know, no response | 88 | |  | |
| **107** | Who is at high risk of getting ill if they get Corona?        **Record all that you are off** | Pregnant women | 0 | | 1 | |
| Women | 0 | | 1 | |
| Men | 0 | | 1 | |
| Elderly/over 50/over 60 | 0 | | 1 | |
| Children | 0 | | 1 | |
| Adolescents and youth |  | |  | |
| Everybody | 0 | | 1 | |
| People with HIV | 0 | | 1 | |
| People with TB | 0 | | 1 | |
| People who are already sick/weak immune systems | 0 | | 1 | |
| People in cold countries | 0 | | 1 | |
| Other | 0 | | 1 | |
| Don't know, no response |  | | 88 | |
| **108** | What are the symptoms of Corona virus disease?        **Record all you are aware of** | None that i know of | 0 | | 1 | |
| Fever/High Fever above 38 | 0 | | 1 | |
| Headache | 0 | | 1 | |
| Dry cough | 0 | | 1 | |
| Diarrhea | 0 | | 1 | |
| Difficulty breathing | 0 | | 1 | |
| Loss of taste | 0 | | 1 | |
| Loss of smell | 0 | | 1 | |
| Tiredness/Fatigue | 0 | | 1 | |
| Chest pain | 0 | | 1 | |
| Chills | 0 | | 1 | |
| Rash | 0 | | 1 | |
| Dizziness | 0 | | 1 | |
| Sneezing | 0 | | 1 | |
| Sore throat | 0 | | 1 | |
| Body Ache | 0 | | 1 | |
| Other | 0 | | 1 | |
| Don't know, no response | 88 | |  | |
| **109** | How can one prevent Corona?      **Record all mentioned** | No Coronavirus prevention methods that I know of | 0 | | 1 | |
|
| Wash hands with soap and running water | 0 | | 1 | |
| use hand sanitizer | 0 | | 1 | |
| Do not touch face | 0 | | 1 | |
| Do not shake hands | 0 | | 1 | |
| Do not touch anything outside of household | 0 | | 1 | |
|
| Stand 2 meters away from people | 0 | | 1 | |
| Scrub/clean surfaces | 0 | | 1 | |
| Stay home unless urgent | 0 | | 1 | |
| Don't go to church/mosque | 0 | | 1 | |
| Don't go to weddings/funerals | 0 | | 1 | |
| Use digital money/Mobile money eg MPESA, Airtel Money, Cards | 0 | | 1 | |
| Wear masks | 0 | | 1 | |
| Go upcountry | 0 | | 1 | |
|  |  | |  | |
| Drink local alcohol/chew miraa | 0 | | 1 | |
| Avoid contact with other people completely | 0 | | 1 | |
| Reduce the number of people I come in contact with | 0 | | 1 | |
| Take chloroquine/malaria medication | 0 | | 1 | |
| Avoid hospitals/clinics | 0 | | 1 | |
| Avoid public transport/travelling | 0 | | 1 | |
| Get tested for coronavirus | 0 | | 1 | |
| Other |  | |  | |
| Don't know, no response | 88 | |  | |
|  | Perception of COVID-19 disease | | | | | |
| **110** | Do you think your chance of getting infected with Corona is low, medium, or high, or do you have no risk at all? | Low | 1 | |  | |
|  | Medium | 2 | |  | |
|  | High | 3 | |  | |
|  | No risk | 4 | |  | |
|  | Already had Coronavirus | 5 | |  | |
|  | Don't know, no response | 88 | |  | |
| **111** | Why do you think you are at low/not at risk? | I'm young | 1 | |  | |
| God protects me | 2 | |  | |
| The hot weather/climate | 3 | |  | |
| COVID is not in Africa/Kenya | 4 | |  | |
| I have not travelled | 5 | |  | |
| I am not a Mzungu or Chinese | 6 | |  | |
| COVID is a lie/gov't just trying to get money | 7 | |  | |
| Don't know anyone with Corona | 88 | |  | |
| Other | 98 | |  | |
| **112** | Do you think the chance of anyone/someone in my community getting Coronavirus is low, medium or high, or is there no risk at all? | Low | 1 | |  | |
| Medium | 2 | |  | |
| High | 3 | |  | |
| No risk | 4 | |  | |
| Don't know, no response | 88 | |  | |
| **113** | How concerned would you be if you became infected with Coronavirus? | Not concerned | 1 | |  | |
| Mildly concerned | 2 | |  | |
| Very concerned | 3 | |  | |
| Don't know, no response | 88 | |  | |
| **114** | How concerned would you be if someone in your household became infected with Coronavirus? | Not concerned | 1 | |  | |
| Mildly concerned | 2 | |  | |
| Very concerned | 3 | |  | |
| Live alone | 4 | |  | |
| Don't know, no response | 88 | |  | |
| **115** | Do you know anyone in your family, neighborhood or workplace who has been infected with the Coronavirus? Would you say: | Yes, I know someone who tested positive | 1 | |  | |
| Yes, I know someone who is suspected of being positive but hasn't gone for a test | 2 | |  | |
| No, I don't know anyone | 3 | |  | |
|  |  |  | **True** | | **False** | |
| **116** | For each of the following statements enter whether it is true or False | Africans/black people do not get infected with Coronavirus | 1 | | 0 | |
| Drinking alcohol, tea, juices or other concoctions will kill Coronavirus | 1 | | 0 | |
| Only rich people can get infected with Coronavirus | 1 | | 0 | |
| Coronavirus is just a common cold | 1 | | 0 | |
| Coronavirus cannot spread in hot places | 1 | | 0 | |
| Coronavirus is a punishment from God | 1 | | 0 | |
|  |  | **Check box** | **No** | | **Yes** | |
| **117** | What are your three main fears and concerns regarding Corona? (UP TO THREE)        **Record UPTO THREE fears and concerns in order of importance** | Death/deadly virus/virus kills people | 0 | | 1 | |
| There is no cure/treatment | 0 | | 1 | |
| It will lead to crime in the community | 0 | | 1 | |
| Loss of income/job/closing business | 0 | | 1 | |
| Food shortage | 0 | | 1 | |
| No transport available | 0 | | 1 | |
| Inability to pay rent | 0 | | 1 | |
| Don't know where to get treatment | 0 | | 1 | |
| It's hard to keep away from crowds | 0 | | 1 | |
| Will infect other people | 0 | | 1 | |
| We are being lied to - | 0 | | 1 | |
| Being hospitalized | 0 | | 1 | |
| Being quarantined | 0 | | 1 | |
| Being separated from family | 0 | | 1 | |
| Other | 0 | | 1 | |
|  | **Source of information and its impact on practices and behavior** | | | | | |
|  |  | **Check boxes** | **NO** | | **YES** | |
| **118** | From what sources have you gotten information about the Coronavirus disease?            **Record all that you receive information from** | No sources mentioned | 0 | | 1 | |
| Government SMS's | 0 | | 1 | |
| Friends | 0 | | 1 | |
| Spouse | 0 | | 1 | |
| Other family | 0 | | 1 | |
| Acquaintances / neighbors | 0 | | 1 | |
| Work colleagues | 0 | | 1 | |
| Public health facility (hosp, clinic) | 0 | | 1 | |
| Private health clinic (hosp, clinic) | 0 | | 1 | |
| NGO provider | 0 | | 1 | |
| Pharmacy | 0 | | 1 | |
| Community health worker | 0 | | 1 | |
| Traditional healer | 0 | | 1 | |
| Television programs/shows | 0 | | 1 | |
| Radio programs/shows | 0 | | 1 | |
| Public announcement with megaphone | 0 | | 1 | |
| Internet | 0 | | 1 | |
| Books, magazines | 0 | | 1 | |
| Posters / print advertisements | 0 | | 1 | |
| Social media (text, FB,,Twitter, SnapChat) | 0 | | 1 | |
| Church | 0 | | 1 | |
| Community meetings/spaces | 0 | | 1 | |
| Work | 0 | | 1 | |
| Other |  | |  | |
| Don't know, no response | 88 | |  | |
| **119** | How often do you use the following sources of information to stay informed about the novel coronavirus?  On a scale of 1-5  1=none  2-rarely  3=sometimes  4-all the times | Government SMS's | 1 | 2 | 3 | 4 |
| Conversations with family and friends |  |  |  |  |
| Spouse |  |  |  |  |
| Acquaintances / neighbors |  |  |  |  |
| Work colleagues |  |  |  |  |
| Public health facility (hosp, clinic) |  |  |  |  |
| Private health clinic (hosp, clinic) |  |  |  |  |
| NGO provider |  |  |  |  |
| Pharmacy |  |  |  |  |
| Community health worker |  |  |  |  |
| Television programs/shows |  |  |  |  |
| Radio programs/shows |  |  |  |  |
| Public announcement with megaphone |  |  |  |  |
| Websites or online news pages |  |  |  |  |
| Books, magazines |  |  |  |  |
| Posters / print advertisements |  |  |  |  |
| Social media (text, FB,,Twitter, SnapChat) |  |  |  |  |
| Church |  |  |  |  |
| Community meetings/spaces |  |  |  |  |
| **120** | Since you started receiving messages about COVID-19, state if true or false to the following statements | | True | | False | |
|  | I wash my hands more frequently in typical day | | 1 | | 0 | |
|  | I have avoided crowds or places with many people | | 1 | | 0 | |
|  | I avoid unnecessary travel | | 1 | | 0 | |
|  | I use a hand sanitizer when I cannot access water and soap | | 1 | | 0 | |
|  | I have set up more hand washing facilities in my house | | 1 | | 0 | |
|  | I have a acquired a mask for use while in public places | | 1 | | 0 | |
|  | I am using the mask while going to public places | | 1 | | 0 | |
| **121a** | Most members of my household are currently doing something to prevent Coronavirus | Agree | 1 | |  | |
| Disagree | 2 | |  | |
| Don’t know, no response | 88 | |  | |
| **122b** | Most people in my community are currently doing something to prevent Coronavirus | Agree | 1 | |  | |
| Disagree | 2 | |  | |
| Don’t know, no response | 88 | |  | |
| **Check boxes** | NO | | YES | |
| **123** | Which of the following have you done this past week compared to before COVID-19? | Stayed at home more | 0 | | 1 | |
| Stopped attending social gatherings (e.g. weddings/funerals/church /mosque) | 0 | | 1 | |
| Kept a distance of at least 2 meters | 0 | | 1 | |
| Informed people of illness symptoms | 0 | | 1 | |
| Washed hands/used hand sanitizer more frequently | 0 | | 1 | |
| Checked the news more frequently | 0 | | 1 | |
| Nothing | 0 | | 1 | |
| Don't know/no response | 88 | |  | |
| **124** | About how many times a day do you wash your hands (not including using hand sanitizer)? | None | 1 | |  | |
| 1 to 3 | 2 | |  | |
| 4 to 6 | 3 | |  | |
| 7 to 10 | 4 | |  | |
| 11 to 15 | 5 | |  | |
| 15+ | 6 | |  | |
| Don't know | 9 | |  | |
| **125** | Of those times, would say that you wash your hands, do you use soap always, some of the time, rarely or never? | Always | 1 | |  | |
| Sometimes | 2 | |  | |
| Rarely | 3 | |  | |
| Never | 4 | |  | |
| **126** | What are the main barriers that prevent you from washing your hands frequently with soap? | Don't have water in my house | 1 | |  | |
| Don't have access to soap in my house | 2 | |  | |
| Don't have access to water in the community | 3 | |  | |
| Don't have access to soap in the community | 4 | |  | |
| Cannot afford extra soap/water | 5 | |  | |
| No barriers | 6 | |  | |
| Other | 98 | |  | |
|  |  | **Check box** | **No** | | **Yes** | |
| **127** | What are some of the challenges members in your community may face in being able to frequently wash their hands or use hand sanitizers? | No personal source of water | 0 | | 1 | |
| Not enough hand washing stations in community | 0 | | 1 | |
| Cannot afford extra water | 0 | | 1 | |
| Cannot afford/access soap | 0 | | 1 | |
| Hand sanitizers have run out in stores | 0 | | 1 | |
| Price of hand sanitizers is not affordable | 0 | | 1 | |
| There are no challenges | 0 | | 1 | |
| Other |  | |  | |
| **128** | About how many times a day do you use hand sanitizer? | None | 0 | |  | |
| 1 to 3 | 1 | |  | |
| 4 to 6 | 2 | |  | |
| 7 to 10 | 3 | |  | |
| 11 to 15 | 4 | |  | |
| 15+ | 6 | |  | |
| Don’t know | 99 | |  | |
| **129** | What are the main barriers that prevent you from using hand sanitizer? | It is not available in the shops | 1 | |  | |
| It is too expensive/I cannot afford it | 2 | |  | |
| I don't think it helps | 3 | |  | |
| Other | 88 | |  | |
| **130** | In the past one week, have you worn a face mask? | No | 0 | |  | |
| Yes | 1 | |  | |
| **131** | When you are outside of your house, did you where the facemask always, sometimes, or rarely? | Always | 1 | |  | |
| Sometimes | 2 | |  | |
| Rarely | 3 | |  | |
|  |
| **132** | When outside of your house, where did you wear the face mask? | Everywhere outside my house | 1 | |  | |
| When walking on the street | 2 | |  | |
| When riding a bicycle | 3 | |  | |
| When on public transport (matatu/boda) | 4 | |  | |
| In supermarkets/markets/shops | 5 | |  | |
| At work | 6 | |  | |
| Other | 88 | |  | |
| **133** | What keeps you from wearing a face mask? | I don't have one because I cannot afford it | 1 | |  | |
| I don't have one because I don't know how to get one/can't find one | 2 | |  | |
| I don't think they work | 3 | |  | |
| They are uncomfortable | 4 | |  | |
| I’m not allowed to wear one | 5 | |  | |
| Others | 88 | |  | |
| **134** | If you begin exhibiting symptoms, which of any actions will you take? | **Check boxes** | **No** | | **YES** | |
| Stay at home more | 0 | | 1 | |
| Stop attending social gatherings | 0 | | 1 | |
| Keep a distance of at least 2 meters | 0 | | 1 | |
| Inform people of illness symptoms | 0 | | 1 | |
| Wash hands more frequently | 0 | | 1 | |
| Go to clinic | 0 | | 1 | |
| Go for Corona test | 0 | | 1 | |
| Nothing | 0 | | 1 | |
| Don't know/no response | 88 | | 1 | |
| **135** | If you were told someone in your household might have coronavirus, do you have a separate room or space for them to stay in? | | 0 | | 1 | |
| **136** | We understand that self-isolation, or keeping oneself from being in close physical contact with others, can be challenging? If members of your community were asked to stay home for 14 days in self isolation, do you think they would be able to do it? | | 0 | | 1 | |
| **137** | Why would they not be able to self-isolate? | Many people live in one room house | 0 | | 1 | |
| All family members share a bed |  | | 1 | |
| Many families share a toilet/rooms are not self-contained | 0 | | 1 | |
| Cannot afford to stay home/lose income | 0 | | 1 | |
| Young people still need to meet | 0 | | 1 | |
| No money for place to self-isolate | 0 | | 1 | |
| Other | 0 | | 1 | |
|  | Effect of COVID-19 on health care seeking and lifestyle | | | | | |
|  |  | Check box | No | | Yes | |
| **138** | Which health care/services/medicines have you not been able to access due to the current COVID-19 pandemic? | Check/medicine for malaria | 0 | | 1 | |
| Check/medicine for stomach/digestive problems | 0 | | 1 | |
| Check/medicine for diabetes/blood pressure | 0 | | 1 | |
| Care for any acute illness | 0 | | 1 | |
| Refills of any other regular medications you may take | 0 | | 1 | |
| Immunizations/nutrition services for children | 0 | | 1 | |
| Check/medicine for pre-natal care (only women) | 0 | | 1 | |
| Accessing e-pills and other contraceptives | 0 | | 1 | |
| Accessing condoms | 0 | | 1 | |
| Accessing sanitary towels | 0 | | 1 | |
| Accessing my Anti-retroviral treatment | 0 | | 1 | |
| HIV/AIDS counselling | 0 | | 1 | |
| Medication for mental health |  | |  | |
| Other | 0 | | 1 | |
| **139** | What other aspects of your life has been affected as result of COVID-19 virus | I See my family less | 0 | | 1 | |
| I have experienced significant reduction of income | 0 | | 1 | |
| I have experienced challenges accessing a face mask | 0 | | 1 | |
| have been able to stay at home during this period | 0 | | 1 | |
| I see my friends less | 0 | | 1 | |
| I Avoid public transport | 0 | | 1 | |
| Complete loss of job | 0 | | 1 | |
| Increased expenses for the household | 0 | | 1 | |
| More housework (cooking, cleaning, caring for children/sick) | 0 | | 1 | |
| I have experienced more stress and psychological trauma | 0 | | 1 | |
| Increase of crime in my neighborhood? | 0 | | 1 | |
| Experienced more violence outside the house? | 0 | | 1 | |
| Experienced more violence inside the household? | 0 | | 1 | |
| Not purchasing sanitary pads | 0 | | 1 | |
| Not accessing health care/services/medicines that you would have otherwise needed | 0 | | 1 | |
| Increase in food prices | 0 | | 1 | |
| I have experienced stigma and discrimination from my community around COVID-19 |  | |  | |
| Other | 0 | | 1 | |
|  | Discrimination by my employer (if employed) |  | |  | |
| **140** | If you were told by the government to stay in your house for the next two weeks, what would be your critical needs to make it through that period? | Food | 0 | | 1 | |
| Water | 0 | | 1 | |
| Medicine | 0 | | 1 | |
| Airtime/data bundles | 0 | | 1 | |
| I just wouldn't stay at home | 0 | | 1 | |
| Money | 0 | | 1 | |
| Medicine/medical care/health services | 0 | | 1 | |
| Unable to go to my usual place of work | 0 | | 1 | |
| Other | 88 | |  | |
|
|
